# Supplementary material for: Surface modification of intraocular lenses via photodynamic coating for safe and effective PCO prevention
Source: Royal Society of Chemistry journal article supplement (doi:10.1039/d0tb02802a), 2021-01-01
Supplement: d0tb02802a1.pdf [file d0tb02802a1.pdf]

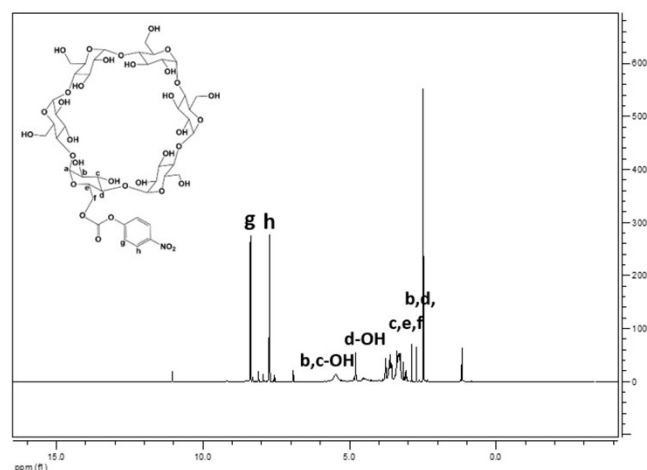

**Fig S1.** <sup>1</sup>H-NMR spectra of the synthesis process of α-CD-NC.

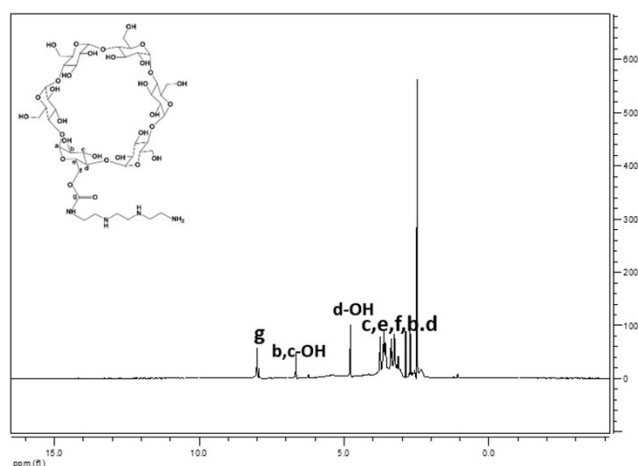

**Fig S2.** <sup>1</sup>H-NMR spectra of the synthesis process of α-CD-NH<sub>2</sub>.

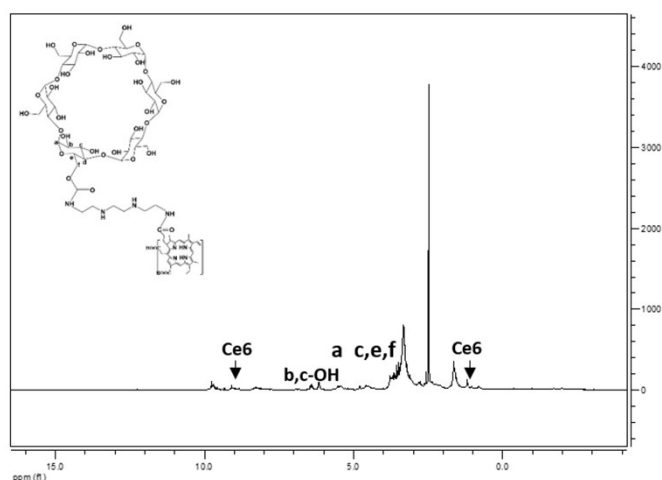

**Fig S3.** <sup>1</sup>H NMR spectra of the synthesis process of α-CD-Ce6.
